# Supplementary material for: Dosing Cefazolin for Surgical Site Infection Prophylaxis in Adolescent Idiopathic Scoliosis Surgery: Intermittent Bolus or Continuous Infusion?
Source: Preprints.org preprint supplement (doi:10.20944/preprints202405.0828.v1), 2024-05-13
Supplement: Supplementary file 1 [file Table S3 - BP.docx]

**Table S3.** Comparison of Cefazolin Concentrations.

|  | **Bolus**  ***Median (Min, Max)***  ***Mean (SD)*** | **Infusion**  ***Median (Min, Max)***  ***Mean (SD)*** | ***p* value** |
| --- | --- | --- | --- |
| Normalized Dose (mg/kg) | 60.33 (59.17, 89.95)  67.45 (15.03) | 73.26 (64.71, 88.12)  74.97 (9.33) | 0.3024 |
| Plasma Cefazolin Concentration  (min g/ml/mg) | 8.96 (7.56, 15.64)  10.18 (3.26) | 8.23 (7.26, 12.17)  9.07 (2.05) | 0.6859 |
| Muscle Cefazolin Concentration  (min g/ml/mg) | 3.22 (1.77, 7.62)  3.96 (2.53) | 5.84 (3.01, 11.35)  6.23 (3.10) | 0.4162 |
| Subcutaneous Cefazolin Concentration  (min g/ml/mg) | 3.21 (2.33, 8.24)  4.25 (2.69) | 6.13 (3.20, 11.22)  6.56 (2.99) | 0.3024 |
