# Supplementary material for: Dosing Cefazolin for Surgical Site Infection Prophylaxis in Adolescent Idiopathic Scoliosis Surgery: Intermittent Bolus or Continuous Infusion?
Source: Preprints.org preprint supplement (doi:10.20944/preprints202405.0828.v1), 2024-05-13
Supplement: Supplementary file 2 [file Table S4 - BP.docx]

**Table S4.** Proportion of the Operative Time Spent Below a Threshold Concentration of 32 µg/ml Cefazolin in Adipose and Muscle Compartments for Bolus and Infusion Groups.

|  | **Bolus**  ***Median (Min, Max)***  ***Mean (SD)*** | **Infusion**  ***Median (Min, Max)***  ***Mean (SD)*** | ***p* value** |
| --- | --- | --- | --- |
| Adipose | .18 (.03, .67)  .27 (.29) | .02 (.01, .04)  .02 (.01) | .0709 |
| Muscle | .29 (.01, .67)  .32 (.28) | .02 (.01, .07)  .03 (.03) | .2148 |
| Plasma | .68 (.64, .80)  .71 (.07) | .84 (.63, .85)  .80 (.09) | .1777 |
